# Supplementary material for: BF2-bound chromophore-containing N⁁NPt(ii) bisacetylide complex and its application as sensitizer for triplet–triplet annihilation based upconversion
Source: Royal Society of Chemistry journal article supplement (doi:10.1039/c1ra00434d), 2011-12-07
Supplement: c1ra00434d.pdf [file c1ra00434d.pdf]

Supporting information for

**BF<sub>2</sub>-Bound Chromophore-containing N<sup>N</sup> Pt(II) Bisacetylde Complex and Its Applications As Sensitizer for Triplet-triplet annihilation Based Upconversion**

Yifan Liu, Qiuting Li, Jianzhang Zhao\* and Huimin Guo\*

*State Key Laboratory of Fine Chemicals, School of Chemical Engineering, Dalian University of Technology,  
E-208 West Campus, 2 Ling-Gong Road, Dalian 116024, P. R. China.*

E-mail: zhaojzh@dlut.edu.cn (JZ) and guohm@dlut.edu.cn (HG)

Group homepage: <http://finechem.dlut.edu.cn/photochem>

## Experimental Section

### Synthesis:

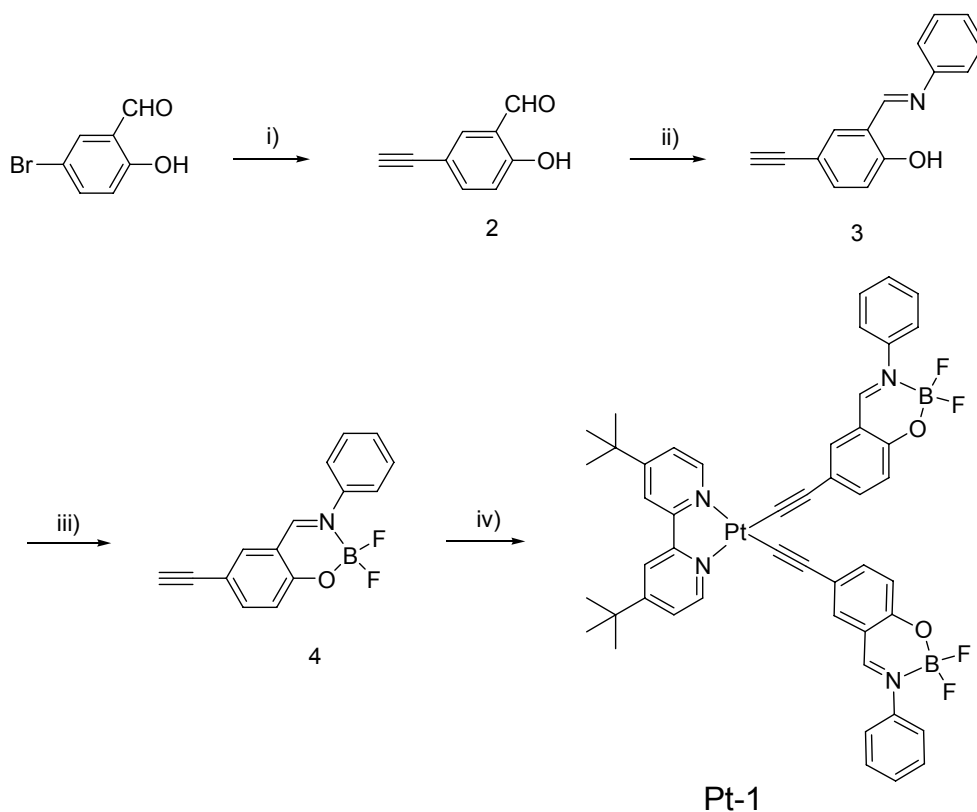

**Scheme 1.** Synthesis route of target donors **Pt-1**. i)  $\text{Pd}(\text{PPh}_3)_4$ ,  $\text{CuI}$ ,  $\text{NEt}_3$ , ethynyltrimethylsilane, argon atmosphere,  $80\text{ }^\circ\text{C}$ , 3 h, then THF, TBAF, room temperature, 30 min, 36.8 %; ii) aniline, ethanol,  $50\text{ }^\circ\text{C}$ , 4 h, 95 % iii)  $\text{CH}_2\text{Cl}_2$ ,  $\text{NEt}_3$ ,  $\text{BF}_3\text{-Et}_2\text{O}$ , room temperature, 20 min, 71%. iv)  $\text{CH}_2\text{Cl}_2$ ,  $i\text{-Pr}_2\text{NH}$ , room temperature, 24 h.

### Synthesis Procedures

#### 5-ethynyl-2-hydroxybenzaldehyde (**2**)

5-ethynyl-2-hydroxybenzaldehyde was synthesized according to a literature procedure.<sup>[1]</sup>

[1]. Christoph Beyer and Hans-Achim Wagenknecht. *J. Org. Chem.*, 2010, **75**, 2752–2755.

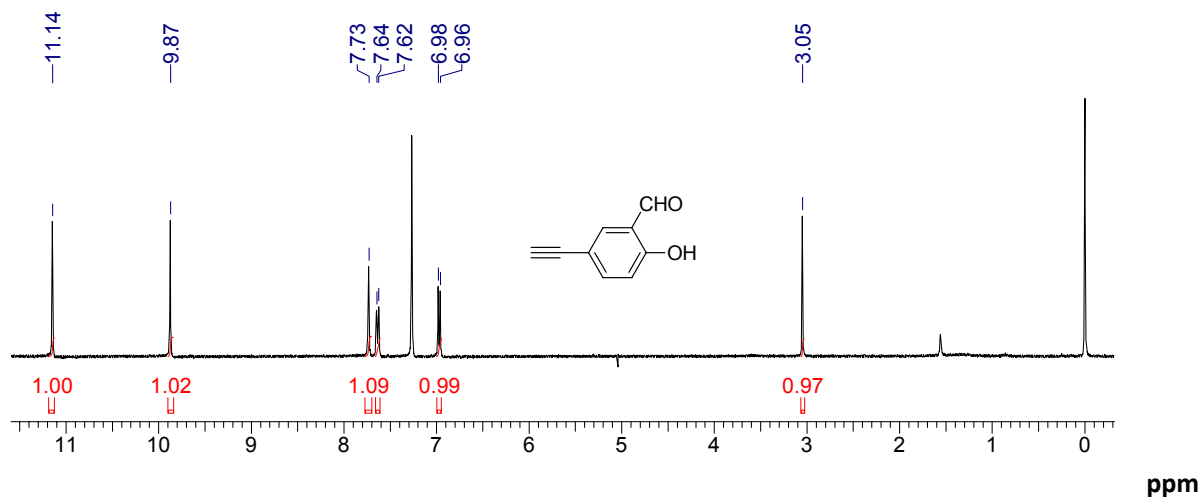

Figure S1. <sup>1</sup>H NMR of **2** (CDCl<sub>3</sub>, 400 MHz).

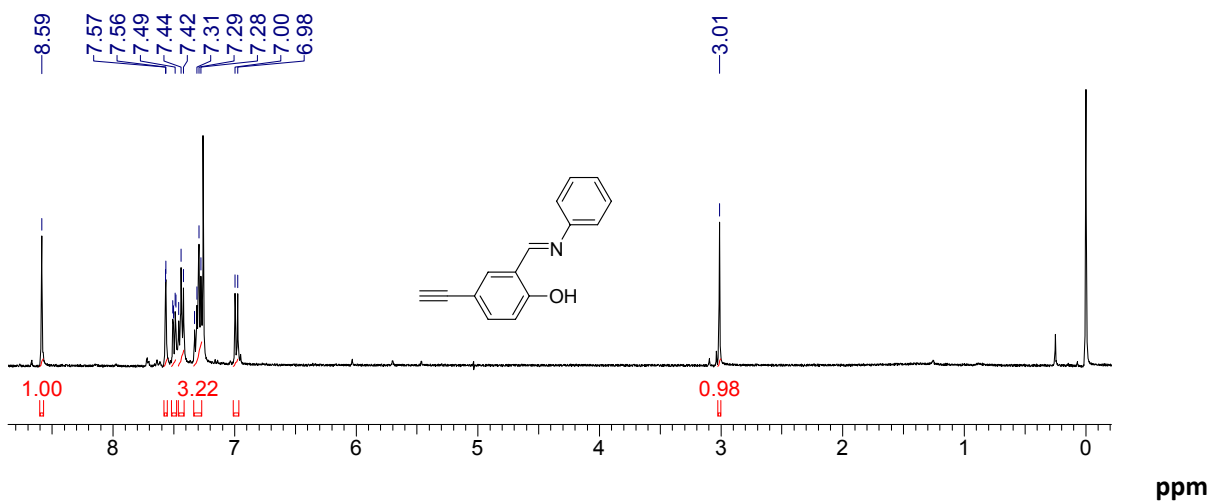

Figure S2. <sup>1</sup>H NMR of **3** (CDCl<sub>3</sub>, 400 MHz).

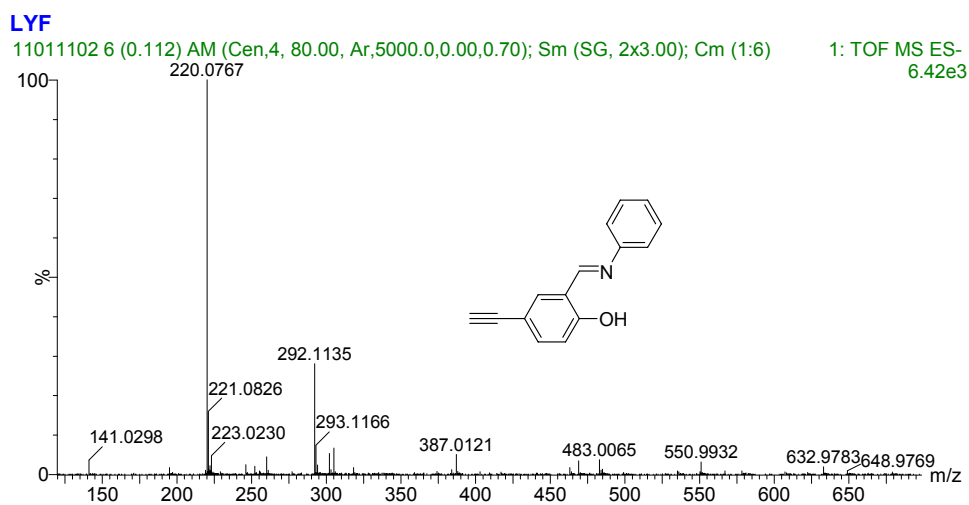

Figure S3. TOF HRMS ESI of **3**.

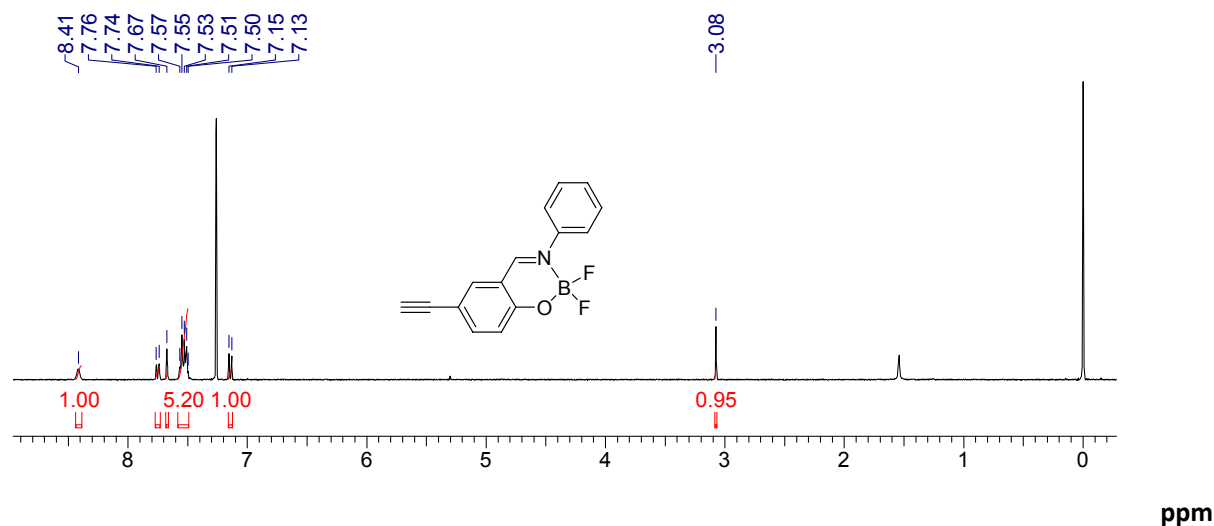

Monoisotopic Mass, Odd and Even Electron Ions  
14 formula(e) evaluated with 5 results within limits (up to 50 closest results for each mass)

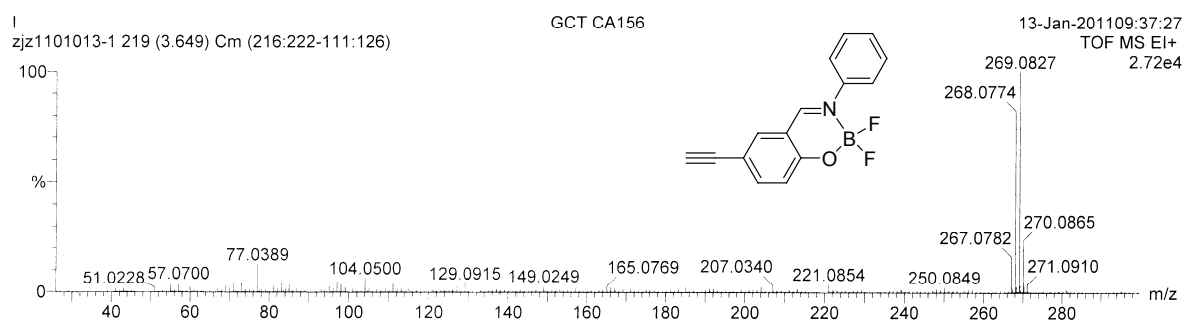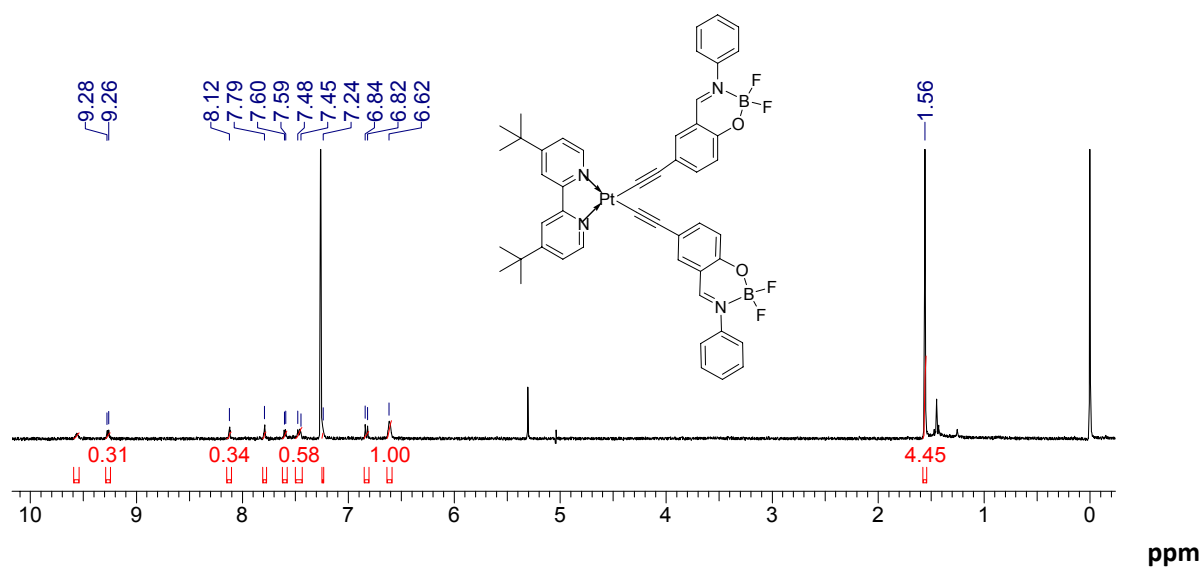

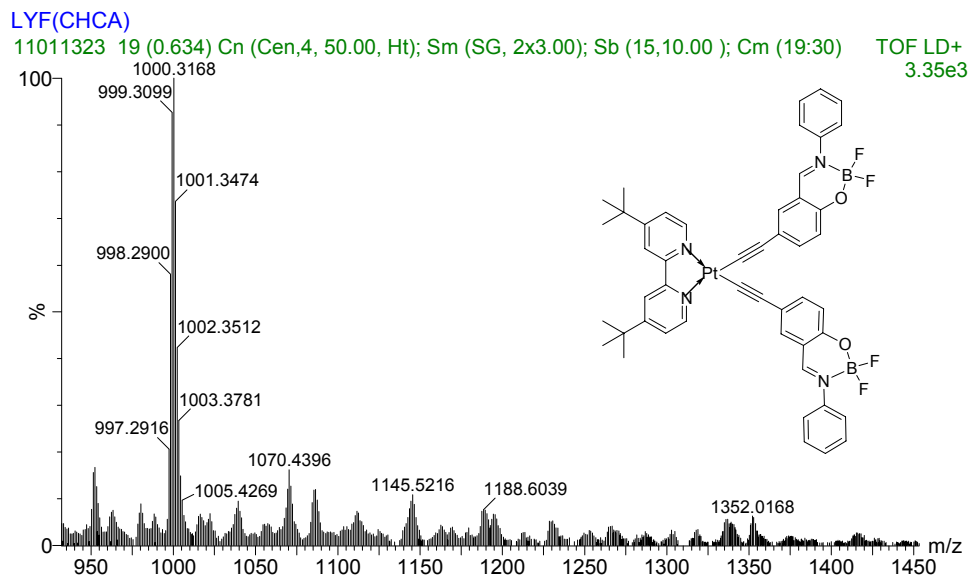

Figure S7. TOF HRMS ESI of Pt-1.

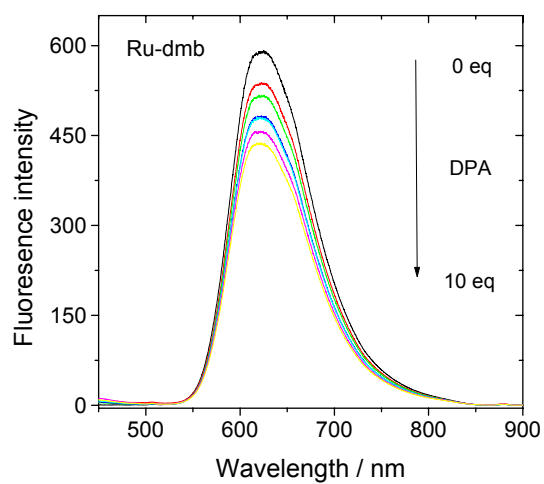

Figure S8. Phosphorescence emission spectra of Ru(dmb)<sub>3</sub>[PF<sub>6</sub>]<sub>2</sub> (λ<sub>ex</sub> = 440 nm) with increasing the DPA concentration in deaerated toluene. The concentration of all complexes is 1.0 × 10<sup>-5</sup> mol L<sup>-1</sup>, 25 °C.

**Symbolic Z-matrix for Complex Pt-1 (DFT//B3LYP/6-31G(d) / LanL2DZ)**

Charge = 0 Multiplicity = 3

0 3

|   |              |             |             |
|---|--------------|-------------|-------------|
| C | -3.45221085  | -2.31530735 | -2.16484355 |
| C | -4.48456667  | -3.18249014 | -2.46667471 |
| C | -5.61287470  | -3.26102850 | -1.62649584 |
| C | -5.64714565  | -2.44650455 | -0.46110271 |
| C | -4.58078628  | -1.56765053 | -0.17179887 |
| C | -3.47263384  | -1.47758744 | -1.01150007 |
| H | -2.58992407  | -2.25876304 | -2.82190169 |
| H | -4.45487957  | -3.81264588 | -3.34889108 |
| H | -4.62450794  | -0.95759560 | 0.72616758  |
| O | -6.59036637  | -4.09779687 | -1.91455187 |
| C | -6.75254427  | -2.58385841 | 0.42436435  |
| H | -6.74961480  | -2.02897490 | 1.36227270  |
| N | -7.77723013  | -3.35393356 | 0.16527134  |
| C | -8.81297088  | -3.51890874 | 1.13891452  |
| C | -10.15003816 | -3.51953344 | 0.72121663  |
| C | -11.16135452 | -3.66247978 | 1.66805369  |
| C | -10.85329568 | -3.80848920 | 3.02311436  |
| C | -9.51910177  | -3.82172301 | 3.43163434  |
| C | -8.49682187  | -3.68370599 | 2.49307387  |
| H | -10.37458130 | -3.39627833 | -0.33105100 |
| H | -12.19755607 | -3.65757302 | 1.34335239  |
| H | -11.64796856 | -3.92303910 | 3.75414780  |
| H | -9.26871076  | -3.95756376 | 4.47951486  |
| H | -7.45835829  | -3.74252945 | 2.80485483  |
| B | -7.90839841  | -4.11334462 | -1.26006718 |
| F | -8.83061285  | -3.39816884 | -2.00761228 |
| F | -8.29913320  | -5.40279139 | -1.01673847 |
| C | 2.44911388   | -3.41511158 | 0.28377072  |
| C | 3.32505232   | -4.47211021 | 0.39233618  |
| C | 4.72585028   | -4.26526788 | 0.32115050  |
| C | 5.26324955   | -2.93081546 | 0.11080733  |
| C | 4.35444750   | -1.87192162 | 0.01896636  |
| C | 2.94809533   | -2.08215874 | 0.10456888  |
| H | 1.37747731   | -3.56533680 | 0.34191761  |
| H | 2.97834567   | -5.48896965 | 0.54149573  |
| H | 4.72061509   | -0.86165607 | -0.13384602 |
| O | 5.52019603   | -5.28559008 | 0.44158542  |
| C | 6.66035339   | -2.76582124 | -0.00750339 |
| H | 7.06387856   | -1.77184947 | -0.17035772 |
| N | 7.52755441   | -3.79258991 | 0.10902853  |

|    |             |             |             |
|----|-------------|-------------|-------------|
| C  | 8.89920634  | -3.58838856 | -0.16041038 |
| C  | 9.86514236  | -4.34278111 | 0.53236049  |
| C  | 11.21796664 | -4.13810252 | 0.28225299  |
| C  | 11.63922274 | -3.18649673 | -0.65148326 |
| C  | 10.68339480 | -2.44353441 | -1.34676643 |
| C  | 9.32483382  | -2.64210842 | -1.11138480 |
| H  | 9.54102071  | -5.06062928 | 1.27516787  |
| H  | 11.95136249 | -4.72364585 | 0.82940127  |
| H  | 12.69740018 | -3.03328773 | -0.84081713 |
| H  | 10.99376509 | -1.71683671 | -2.09254546 |
| H  | 8.59180119  | -2.09741688 | -1.69754556 |
| B  | 7.03134549  | -5.23531360 | 0.51746082  |
| F  | 7.38228086  | -5.49973867 | 1.82935600  |
| F  | 7.52046513  | -6.16069931 | -0.36770140 |
| C  | 3.63252918  | 3.80360052  | 0.65968899  |
| C  | 3.15987390  | 5.12800424  | 0.66427993  |
| C  | 1.79463229  | 5.29972481  | 0.41866721  |
| C  | 0.94844571  | 4.21055153  | 0.18154827  |
| C  | 2.75602396  | 2.75472739  | 0.41978206  |
| C  | -0.49015584 | 4.32888903  | -0.08154471 |
| C  | -1.18018164 | 5.54451659  | -0.14004359 |
| C  | -2.55330589 | 5.59619446  | -0.39767777 |
| C  | -3.19921124 | 4.36268394  | -0.59519998 |
| C  | -2.47599027 | 3.18045975  | -0.52847233 |
| H  | 4.67388618  | 3.57277025  | 0.84113365  |
| H  | 3.09066683  | 1.72359160  | 0.40934017  |
| H  | -4.25946863 | 4.30485422  | -0.80296010 |
| H  | -2.93842921 | 2.21065219  | -0.67774882 |
| N  | -1.15712706 | 3.15044495  | -0.27771446 |
| N  | 1.44772353  | 2.93672210  | 0.18552264  |
| Pt | 0.02399002  | 1.40542314  | -0.17514295 |
| C  | -1.44288163 | 0.15374949  | -0.52032220 |
| C  | -2.38708066 | -0.59423571 | -0.73660906 |
| C  | 1.24351758  | -0.08286526 | -0.05735366 |
| C  | 2.05965418  | -1.01447213 | 0.01906434  |
| H  | -0.63242378 | 6.46520145  | 0.01658193  |
| H  | 1.37646214  | 6.29853120  | 0.41227916  |
| C  | -3.28306155 | 6.94707179  | -0.45518300 |
| C  | 4.06464570  | 6.34353397  | 0.91790216  |
| C  | -3.13579518 | 7.66264961  | 0.90940544  |
| H  | -2.08825521 | 7.85267271  | 1.16215756  |
| H  | -3.65106892 | 8.62863378  | 0.88350458  |
| H  | -3.57336564 | 7.06660742  | 1.71660792  |
| C  | -2.65352653 | 7.81996638  | -1.56770477 |
| H  | -3.16750279 | 8.78540095  | -1.62188864 |
| H  | -1.59354971 | 8.01957627  | -1.38331663 |
| H  | -2.73874830 | 7.33511185  | -2.54533850 |

|   |             |            |             |
|---|-------------|------------|-------------|
| C | -4.78395440 | 6.78033163 | -0.75796325 |
| H | -4.95482960 | 6.30338328 | -1.72843637 |
| H | -5.29297044 | 6.19026984 | 0.01102654  |
| H | -5.26245414 | 7.76389042 | -0.78638666 |
| C | 4.03119953  | 7.26877832 | -0.32259851 |
| H | 3.02140608  | 7.63183842 | -0.53647050 |
| H | 4.66978791  | 8.14250759 | -0.15535420 |
| H | 4.39617291  | 6.74742824 | -1.21326690 |
| C | 3.54739037  | 7.11746422 | 2.15463067  |
| H | 4.18302396  | 7.98894913 | 2.34334619  |
| H | 2.52396739  | 7.47881110 | 2.01550925  |
| H | 3.56222927  | 6.48681802 | 3.04921811  |
| C | 5.52552363  | 5.93126949 | 1.17848286  |
| H | 5.61860384  | 5.29257732 | 2.06281837  |
| H | 5.95982167  | 5.40296967 | 0.32355974  |
| H | 6.13218439  | 6.82475448 | 1.35376779  |

1 2 1.5 6 1.5 7 1.0

2 3 1.5 8 1.0

3 4 1.5 10 1.0

4 5 1.5 11 1.0

5 6 1.5 9 1.0

6 7 3 1.0

7

8

9

10 25 1.0

11 12 1.0 13 2.0

12

13 14 1.0 25 1.0

14 15 1.5 19 1.5

15 16 1.5 20 1.0

16 17 1.5 21 1.0

17 18 1.5 22 1.0

18 19 1.5 23 1.0

19 24 1.0

20

21

22

23

24

25 26 1.0 27 1.0

26

27

28 29 1.5 33 1.5 34 1.0

29 30 1.5 35 1.0

30 31 1.5 37 1.0



31 32 1.5 38 1.0

32 33 1.5 36 1.0

33 75 1.0

34

35

36

37 52 1.0

38 39 1.0 40 2.0

39

40 41 1.0 52 1.0

41 42 1.5 46 1.5

42 43 1.5 47 1.0

43 44 1.5 48 1.0

44 45 1.5 49 1.0

45 46 1.5 50 1.0

46 51 1.0

47

48

49

50

51

52 53 1.0 54 1.0

53

54

55 56 1.5 59 1.5 65 1.0

56 57 1.5 79 1.0

57 58 1.5 77 1.0

58 60 1.0 70 1.5

59 66 1.0 70 1.5

60 61 1.5 69 1.5

61 62 1.5 76 1.0

62 63 1.5 78 1.0

63 64 1.5 67 1.0

64 68 1.0 69 1.5

65

66

67

68

69 71 1.0

70 71 1.0

71 72 1.0 74 1.0

72 73 3.0

73

74 75 3.0

75

76

77

78 80 1.0 84 1.0 88 1.0

79 92 1.0 96 1.0 100 1.0

80 81 1.0 82 1.0 83 1.0

81

82

83

84 85 1.0 86 1.0 87 1.0

85

86

87

88 89 1.0 90 1.0 91 1.0

89

90

91

92 93 1.0 94 1.0 95 1.0

93

94

95

96 97 1.0 98 1.0 99 1.0

97

98

99

100 101 1.0 102 1.0 103 1.0

101

102

103
